# Supplementary material for: The Spread of Peste Des Petits Ruminants Virus Lineage IV in West Africa
Source: MDPI journal article supplement (doi:10.3390/ani13071268), 2023-04-06
Supplement: s1 [file s1]

**Table S1** Description of samples analysed in this study

| #  | Country       | Sample     | Host  | Location   | Sample type | Date       | Result | GT* | GenBank  |
|----|---------------|------------|-------|------------|-------------|------------|--------|-----|----------|
| 1  | Burkina Faso  | 2113608012 | Sheep | Loumbila   | nasal swab  | 21/12/2021 | +      | IV  | OQ448870 |
| 2  | Burkina Faso  | 2113608013 | Sheep | Loumbila   | nasal swab  | 21/12/2021 | +      | IV  | OQ448871 |
| 3  | Burkina Faso  | BF3        | Sheep | Loumbila   | nasal swab  | 21/12/2021 | -      | -   | -        |
| 4  | Burkina Faso  | BF4        | Sheep | Loumbila   | nasal swab  | 21/12/2021 | -      | -   | -        |
| 5  | Burkina Faso  | 2113608018 | Sheep | Loumbila   | nasal swab  | 21/12/2021 | +      | IV  | OQ448872 |
| 6  | Burkina Faso  | BF6        | Sheep | Loumbila   | nasal swab  | 21/12/2021 | -      | -   | -        |
| 7  | Burkina Faso  | 2113608023 | Sheep | Loumbila   | nasal swab  | 21/12/2021 | +      | IV  | OQ448873 |
| 8  | Burkina Faso  | 1900990099 | Sheep | Sabou      | nasal swab  | 18/02/2019 | +      | II  | OQ448868 |
| 9  | Burkina Faso  | 1900990100 | Sheep | Sabou      | nasal swab  | 18/02/2019 | +      | II  | OQ448869 |
| 10 | Burkina Faso  | BF10       | Sheep | Piela      | nasal swab  | 03/12/2020 | -      | -   | -        |
| 11 | Côte d'Ivoire | XX1        | Goat  | Bouaké     | organs      | 15/06/2015 | N/D    | -   | -        |
| 12 | Côte d'Ivoire | XX2        | Goat  | Bouaké     | organs      | 15/06/2015 | +      | IV  | OQ215762 |
| 13 | Côte d'Ivoire | XX3        | Goat  | Biankouma  | swab        | 03/03/2017 | +      | IV  | OQ215763 |
| 14 | Côte d'Ivoire | XX4        | Goat  | Biankouma  | swab        | 03/03/2017 | -      | -   | -        |
| 15 | Côte d'Ivoire | XX5        | Goat  | Biankouma  | swab        | 03/03/2017 | +      | N/D | -        |
| 16 | Côte d'Ivoire | XX6        | Goat  | Grand Yapo | swab        | 17/12/2013 | +      | II  | OQ215764 |
| 17 | Côte d'Ivoire | XX7        | Goat  | Grand Yapo | swab        | 17/12/2013 | +      | II  | OQ215765 |

|    |               |       |       |            |            |            |   |    |          |
|----|---------------|-------|-------|------------|------------|------------|---|----|----------|
| 18 | Côte d'Ivoire | XX8   | Sheep | Dimbokro   | organs     | 12/06/2018 | + | II | OQ215766 |
| 19 | Côte d'Ivoire | XX9   | Goat  | Agboville  | wab        | 04/02/2018 | + | IV | OQ215767 |
| 20 | Côte d'Ivoire | XX10  | Goat  | Bocanda    | organs     | 06/03/2021 | + | IV | OQ215768 |
| 21 | Côte d'Ivoire | BN1   | Goat  | Bongouanou | swab       | 12/2018    | + | IV | OQ215769 |
| 22 | Côte d'Ivoire | BN2   | Goat  | Bongouanou | swab       | 12/2018    | + | IV | OQ215770 |
| 23 | Côte d'Ivoire | BN3   | Goat  | Bongouanou | swab       | 12/2018    | + | IV | OQ215771 |
| 24 | Côte d'Ivoire | BN4   | Goat  | Bongouanou | swab       | 03/2021    | + | IV | OQ215772 |
| 25 | Côte d'Ivoire | BN5   | Goat  | Bongouanou | swab       | 04/2021    | + | IV | OQ215773 |
| 26 | Côte d'Ivoire | BN6   | Goat  | Bongouanou | swab       | 04/2021    | + | IV | OQ215774 |
| 27 | Côte d'Ivoire | BC1   | Goat  | Bocanda    | swab       | 04/2021    | + | IV | OQ215775 |
| 28 | Côte d'Ivoire | BC2   | Goat  | Bocanda    | swab       | 04/2021    | + | -  | -        |
| 29 | Côte d'Ivoire | BC3   | Goat  | Bocanda    | swab       | 04/2021    | + | IV | OQ215776 |
| 30 | Côte d'Ivoire | BC4   | Goat  | Bocanda    | swab       | 04/2021    | + | IV | OQ215777 |
| 31 | Côte d'Ivoire | BC5   | Goat  | Bocanda    | swab       | 04/2021    | + | IV | OQ215778 |
| 32 | Ghana         | GG22  | Goat  | Tse Ado    | nasal swab | 26/08/2022 | - | -  | -        |
| 33 | Ghana         | NB22  | Sheep | Navrongo   | nasal swab | 10/08/2022 | + | IV | OQ281756 |
| 34 | Ghana         | BB22  | Goat  | Denyira    | nasal swab | 05/08/2022 | - | -  | -        |
| 35 | Guinea        | 1OVF  | Sheep | Boké       | swab       | 03/04/2022 | - | -  | -        |
| 36 | Guinea        | 60OVF | Sheep | Lola       | swab       | 16/12/2021 | + | IV | OQ215759 |
| 37 | Guinea        | 7CapF | Goat  | Samoyé     | swab       | 16/09/2022 | + | IV | OQ215761 |

|    |        |       |       |            |      |            |   |     |          |
|----|--------|-------|-------|------------|------|------------|---|-----|----------|
| 38 | Guinea | 5OVM  | Sheep | Lola       | swab | 16/12/2021 | + | IV  | OQ215758 |
| 39 | Guinea | 9OVF  | Sheep | N'Zérékoré | swab | 29/09/2022 | - | N/A | N/A      |
| 40 | Guinea | 14OVF | Sheep | Dinguiraye | swab | 23/02/2022 | + | II  | OQ215760 |
| 41 | Guinea | 6CapM | Goat  | Kankan     | swab | 26/07/2021 | + | IV  | OQ215757 |
| 42 | Guinea | 12OVF | Sheep | Dinguiraye | swab | 13/01/2022 | - | -   | -        |
| 43 | Guinea | 4CapM | Goat  | Lola       | swab | 26/04/2021 | - | -   | -        |
| 44 | Guinea | 5CapF | Goat  | Dinguiraye | swab | 13/01/2022 | - | -   | -        |

---
