# Supplementary figures and images for: The Spread of Peste Des Petits Ruminants Virus Lineage IV in West Africa
Source: MDPI journal article supplement (doi:10.3390/ani13071268), 2023-04-06

Tree scale: 0.1

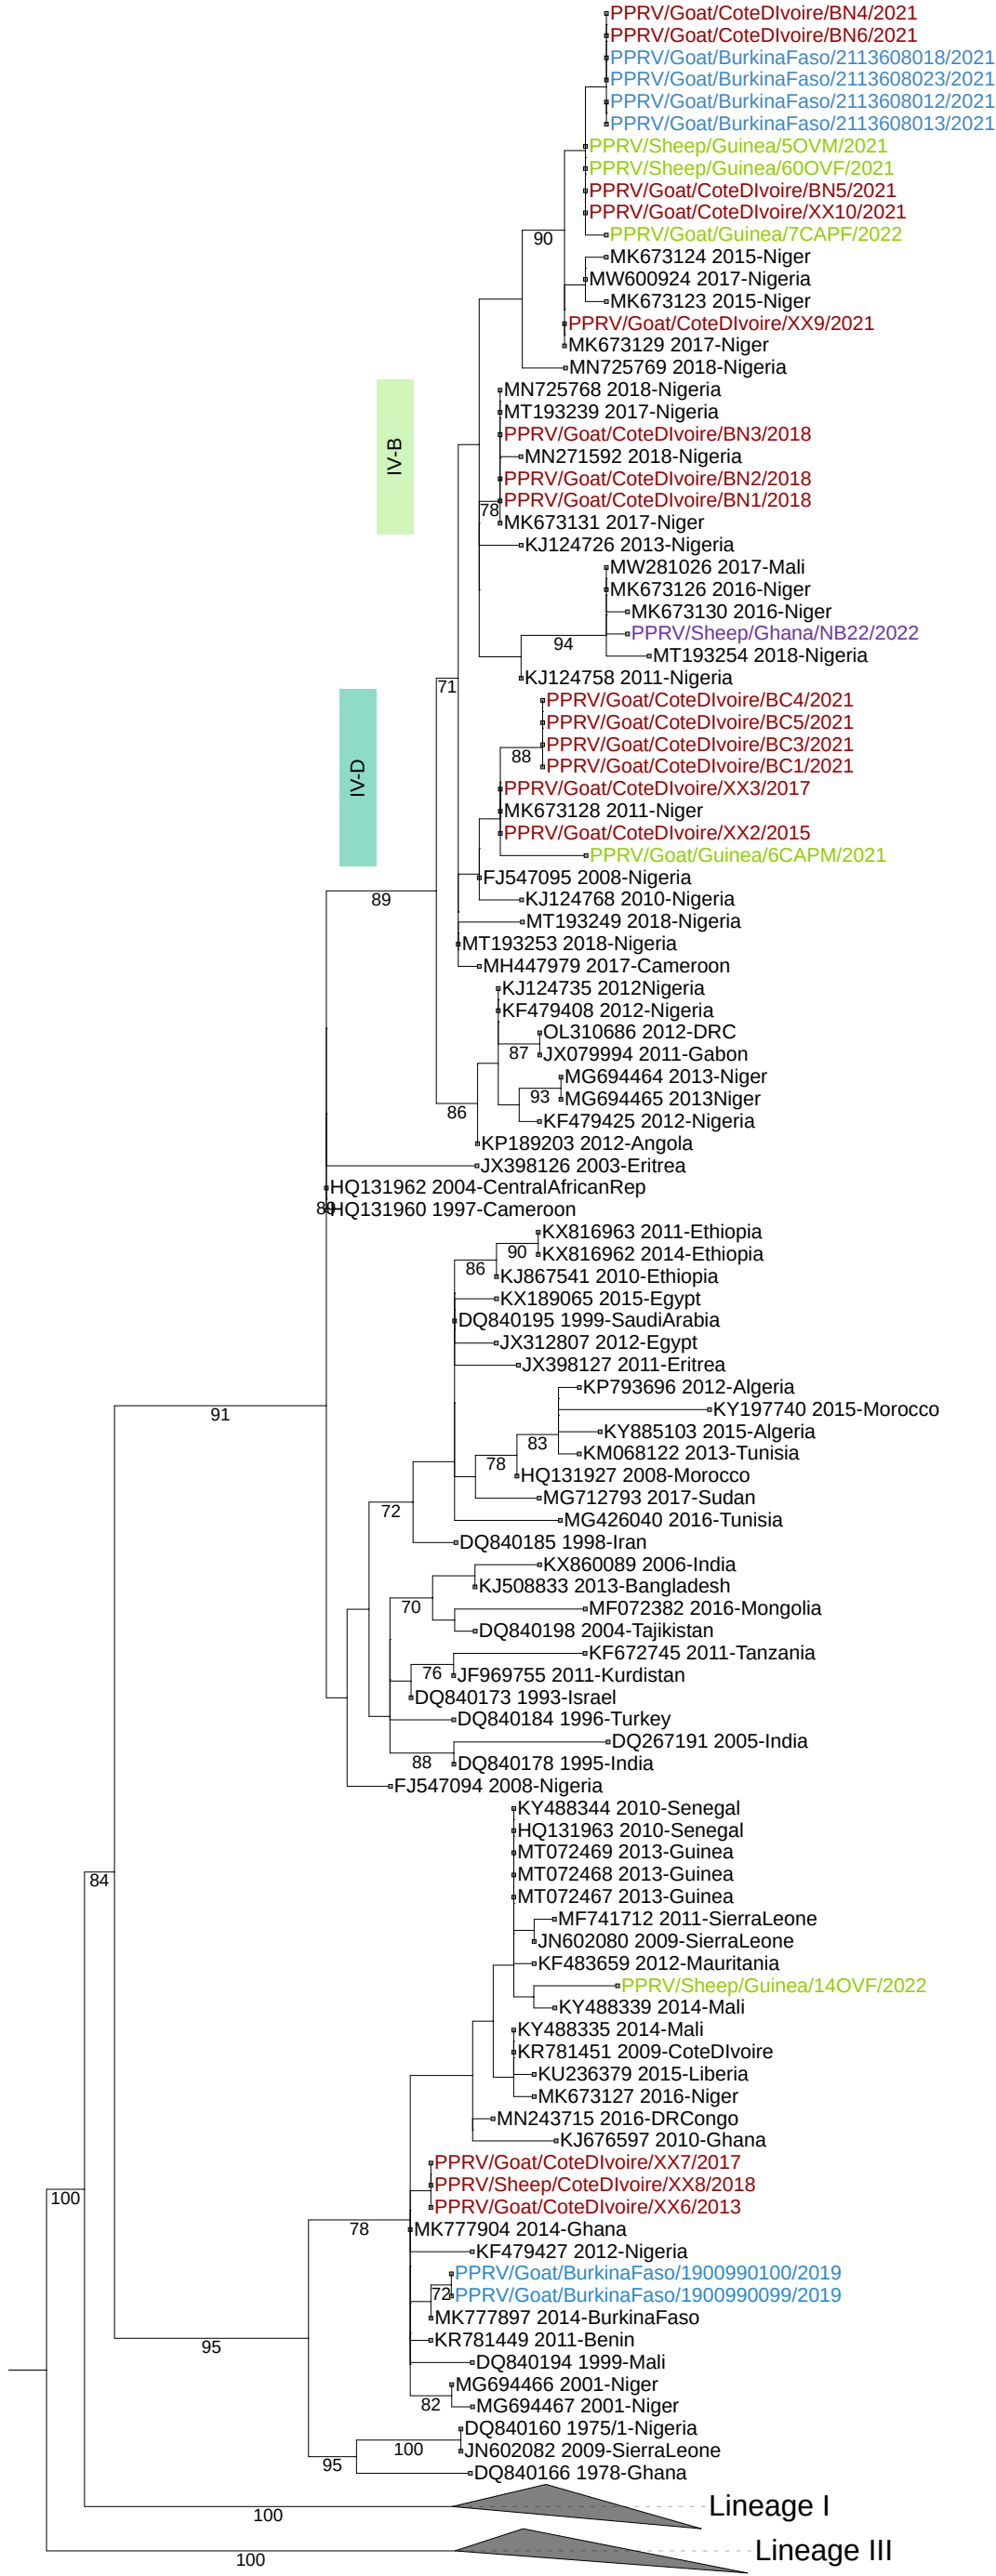

IV-A

IV-C

IV-B

IV-D

Lineage IV

Lineage II

Lineage I

Lineage III

Supplement: s1 [file s1]
